# Supplementary material for: Single-crystal to single-crystal transformation of a coordination chain to a two-dimensional coordination network through a photocycloaddition reaction
Source: Royal Society of Chemistry journal article supplement (doi:10.1039/d1ce00230a), 2021-01-01
Supplement: d1ce00230a1.pdf [file d1ce00230a1.pdf]

## **Electronic Supplementary Information (ESI†)**

### **Single-Crystal to Single-Crystal Transformation of a Coordination Chain to a Two-Dimensional Coordination Network through a Photocycloaddition Reaction**

Fan Yang,<sup>a</sup> Ni Ya Li,<sup>\*a,b</sup> Ye Ge,<sup>\*a</sup> and Dong Liu<sup>\*a,b</sup>

<sup>a</sup> College of Chemistry and Materials Science, Huaibei Normal University, 100 DongShan Road, Huaibei 235000, Anhui, P. R. China

<sup>b</sup> Jiangsu Key Laboratory for Chemistry of Low-Dimensional Materials, School of Chemistry and Chemical Engineering, Huaiyin Normal University, Huaian 223300, Jiangsu, P. R. China

## Table of Contents

|                                                                                                                                                                                                    |     |
|----------------------------------------------------------------------------------------------------------------------------------------------------------------------------------------------------|-----|
| <b>Experimental Section</b> .....                                                                                                                                                                  | S3  |
| General procedure                                                                                                                                                                                  |     |
| Synthesis of $[\text{Cd}(\mu\text{-OH}_2)(2,5\text{-fdc})(\text{bpvb})]_n$ ( <b>1</b> )                                                                                                            |     |
| <i>In-situ</i> synthesis of $[\text{Cd}(\mu\text{-OH}_2)(2,5\text{-fdc})(\text{bpbvpvpcb})_{0.5}]_n$ ( <b>2</b> )                                                                                  |     |
| Isolation of bpbvpvpcb                                                                                                                                                                             |     |
| <b>X-ray diffraction crystallography</b> .....                                                                                                                                                     | S4  |
| <b>Table S1</b> Summary of Crystallographic Data for <b>1</b> and <b>2</b> .....                                                                                                                   | S5  |
| <b>Table S2</b> Selected Bond Lengths (Å) and Angles (°) for <b>1</b> and <b>2</b> .....                                                                                                           | S6  |
| <b>Fig. S1</b> PXRD patterns of <b>1</b> and <b>2</b> .....                                                                                                                                        | S7  |
| <b>Fig. S2</b> The $^{13}\text{C}$ CPMAS NMR spectra of <b>1</b> and <b>2</b> .....                                                                                                                | S8  |
| <b>Fig. S3</b> (a) The $^1\text{H}$ NMR spectrum of bpbvpvpcb in $d_6$ -DMSO at ambient temperature. (b) The $^{13}\text{C}$ NMR spectrum of bpbvpvpcb in $d_6$ -DMSO at ambient temperature. .... | S9  |
| <b>Fig. S4</b> The TGA curves for <b>1</b> and <b>2</b> .....                                                                                                                                      | S10 |

## Experimental Section

**General procedure.** All chemicals and reagents were obtained from commercial sources and used as received. Infrared (IR) sample was prepared as a KBr pellet, and spectrum was obtained in the 4000–400  $\text{cm}^{-1}$  range using a Nicolet Avatar 360 FT-IR spectrophotometer. The elemental analysis for C, H and N was performed on an EA1110 CHNS elemental analyzer. Powder XRD patterns were obtained using a PANalytical X'Pert PRO MPD system (PW3040/60).  $^1\text{H}$  NMR (600 MHz) and  $^{13}\text{C}$  NMR (150 MHz) spectra were recorded in  $\text{DMSO}-d_6$  at room temperature. Cross-polarization magic angle spinning (CPMAS)  $^{13}\text{C}$  NMR spectra were recorded at a resonance frequency of 101.6 MHz on a BRUKER ADVANCE DSX 400 MHz spectrometer at ambient temperature. Thermal analysis was performed with a Perkin\_Elmer TGA-7 thermogravimetric analyser at a heating rate of  $10\text{ }^\circ\text{C min}^{-1}$  and a flow rate of  $100\text{ cm}^3\text{ min}^{-1}$  ( $\text{N}_2$ ). The fluorescence spectra were obtained on a Perkin-Elmer LS55 spectrofluorometer.

**Synthesis of  $[\text{Cd}(\mu\text{-OH}_2)(2,5\text{-fdc})(\text{bpvb})]_n$  (**1**):** To a 25 mL Teflon-lined autoclave was loaded  $\text{Cd}(\text{NO}_3)_2 \cdot 4\text{H}_2\text{O}$  (154 mg, 0.5 mmol), bpvb (142 mg, 0.5 mmol), 2,5- $\text{H}_2\text{tdc}$  (86 mg, 0.5 mmol) and  $\text{H}_2\text{O}$  (15 mL). The Teflon-lined autoclave was sealed and heated in an oven to  $175\text{ }^\circ\text{C}$  for 2 d, and then cooled to ambient temperature at a rate of  $5\text{ }^\circ\text{C h}^{-1}$  to form light-yellow crystals of **1**. Yield: 236 mg (83% yield based on Cd). Anal. calcd. for  $\text{C}_{26}\text{H}_{20}\text{CdN}_2\text{O}_6$ : C, 54.90; H, 3.54; N, 4.92. Found: C, 55.26; H, 3.37; N, 5.09. IR (KBr disc,  $\nu$ ,  $\text{cm}^{-1}$ ): 3435 (*m*), 1599 (*s*), 1554 (*s*), 1495 (*s*), 1448 (*m*), 1413 (*s*), 1222 (*m*), 1139 (*m*), 1074(*s*), 971 (*m*), 818 (*s*), 781 (*m*), 699 (*s*), 546 (*m*).

**In-situ synthesis of  $[\text{Cd}(\mu\text{-OH}_2)(2,5\text{-fdc})(\text{bpbvpvpcb})_{0.5}]_n$  (**2**):** Single crystals of **1** (114 mg) were irradiated with a 20 W UV-LED lamp ( $\lambda = 365\text{ nm}$ ) for approximately 5 h to form crystals of **2** in quantitative yield (based on **1**). Anal. calcd. for  $\text{C}_{26}\text{H}_{20}\text{CdN}_2\text{O}_6$ : C, 54.90; H, 3.54; N, 4.92. Found: C, 55.19; H, 3.71; N, 4.68. IR (KBr disc,  $\nu$ ,  $\text{cm}^{-1}$ ): 3437 (*m*), 1601 (*s*), 1555 (*s*), 1502 (*s*), 1440 (*m*), 1418 (*s*), 1223 (*m*), 1140 (*m*), 1071(*s*), 962 (*m*), 809 (*s*), 785 (*m*), 690 (*s*), 544 (*m*).

**Isolation of bpbvpvpcb:** A mixture of  $\text{Na}_2\text{H}_2\text{edta} \cdot 2\text{H}_2\text{O}$  (112 mg, 0.3 mmol), NaOH (24 mg, 0.6 mmol),  $\text{H}_2\text{O}$  (15 mL),  $\text{CH}_2\text{Cl}_2$  (20 mL) and **2** (114 mg, 0.2 mmol) was placed in a 100 mL flask

and stirred for 2 h. The organic phase was separated from the reaction mixture and the aqueous layers were extracted with CH<sub>2</sub>Cl<sub>2</sub> (3 × 20 mL). The combined organic phase was washed with NaOH solution and H<sub>2</sub>O and dried with anhydrous Na<sub>2</sub>SO<sub>4</sub>. The organic phase was concentrated to dryness in vacuo to give bpbpvpcb as light-yellow powder. Yield: 47 mg (83% yield based on **2**). <sup>1</sup>H NMR (600 MHz, DMSO-*d*<sub>6</sub>): δ 8.75 (d, 2H), 8.49 (d, 2H), 8.45 (dd, 2H), 8.25 (dd, 2H), 8.02 (d, 2H), 7.68 (d, 2H), 7.51 (s, 2H), 7.40 (dd, 2H), 7.31 (m, 4H), 7.18 (m, 8H), 4.69 (s, 4H).

**X-ray diffraction crystallography:** Single-crystal X-ray diffraction data for **1** and **2** were collected with a Bruker SMART APEX II CCD diffractometer equipped with graphite-monochromated Mo-K $\alpha$  ( $\lambda = 0.71073$  Å) by using the  $\Phi/\omega$  scan technique. Absorption correction was based on symmetry equivalent reflections using the SADABS program.<sup>1</sup> Single crystals of **1** and **2** suitable for X-ray analysis were obtained directly from the above preparation procedure. And its structure was solved by direct methods and refined on  $F^2$  by full-matrix least-squares methods with the *SHELXL-2014* program.<sup>2</sup> All non-hydrogen atoms refined anisotropically. The hydrogen atoms of the water molecules in **1** and **2** were located from the Fourier map and included in the final refinement by the use of geometrical restraints with the O–H distances being fixed at 0.85 Å and  $U_{\text{iso}}(\text{H})$  equivalent to 1.5 times  $U_{\text{eq}}(\text{O})$ . All other H atoms were introduced at the calculated positions and included in the structure-factor calculations.

#### References:

- 1 G. M. Sheldrick, *A program for the Siemens Area Detector Absorption correction*, University of Göttingen, Göttingen, Germany, 1997.
- 2 G. M. Sheldrick, *Acta Cryst.*, 2015, **C71**, 3-8.

**Table S1** Summary of Crystallographic Data for **1** and **2**.

| Compound                                   | <b>1</b>                                                        | <b>2</b>                                                        |
|--------------------------------------------|-----------------------------------------------------------------|-----------------------------------------------------------------|
| chemical formula                           | C <sub>26</sub> H <sub>20</sub> CdN <sub>2</sub> O <sub>6</sub> | C <sub>26</sub> H <sub>20</sub> CdN <sub>2</sub> O <sub>6</sub> |
| formula weight                             | 568.85                                                          | 568.85                                                          |
| crystal system                             | triclinic                                                       | triclinic                                                       |
| space group                                | <i>P</i> Error!                                                 | <i>P</i> Error!                                                 |
| <i>a</i> (Å)                               | 9.330(2)                                                        | 9.353(6)                                                        |
| <i>b</i> (Å)                               | 10.120(3)                                                       | 10.076(6)                                                       |
| <i>c</i> (Å)                               | 12.688(3)                                                       | 12.911(8)                                                       |
| $\alpha$ (°)                               | 101.561(8)                                                      | 97.09(2)                                                        |
| $\beta$ (°)                                | 90.354(10)                                                      | 96.377(19)                                                      |
| $\gamma$ (°)                               | 98.996(8)                                                       | 100.882(16)                                                     |
| <i>V</i> (Å <sup>3</sup> )                 | 1158.4(5)                                                       | 1174.4(13)                                                      |
| <i>Z</i>                                   | 2                                                               | 2                                                               |
| <i>D<sub>c</sub></i> (g/cm <sup>3</sup> )  | 1.631                                                           | 1.609                                                           |
| F(000)                                     | 572                                                             | 572                                                             |
| $\mu$ (MoK $\alpha$ , cm <sup>-1</sup> )   | 0.989                                                           | 0.975                                                           |
| total no. of reflns                        | 63141                                                           | 61910                                                           |
| no. of unique reflns                       | 5314                                                            | 5339                                                            |
| no. of obsd. reflns                        | 316                                                             | 316                                                             |
| <i>R</i> <sub>int</sub>                    | 0.0270                                                          | 0.0497                                                          |
| <i>R</i> <sub>1</sub> <sup><i>a</i></sup>  | 0.0202                                                          | 0.0315                                                          |
| <i>wR</i> <sub>2</sub> <sup><i>b</i></sup> | 0.0533                                                          | 0.0652                                                          |
| <i>GOF</i> <sup><i>c</i></sup>             | 1.064                                                           | 1.122                                                           |

<sup>*a*</sup>  $R = \sum |F_o| - |F_c| / \sum |F_o|$ . <sup>*b*</sup>  $wR = \{\sum w(F_o^2 - F_c^2)^2 / \sum w(F_o^2)^2\}^{1/2}$ . <sup>*c*</sup>  $GOF = \{\sum w[(F_o^2 - F_c^2)^2] / (n-p)\}^{1/2}$ ,

where *n* is the number of reflections and *p* is total number of parameters refined.

**Table S2.** Selected bond lengths (Å) and angles (°) for **1** and **2**.

| <b>1</b>          |            |                   |            |
|-------------------|------------|-------------------|------------|
| Cd(1)-O(1)        | 2.2533(13) | Cd(1)-O(6)        | 2.2822(14) |
| Cd(1)-O(3A)       | 2.3214(13) | Cd(1)-N(1)        | 2.3260(15) |
| Cd(1)-N(2B)       | 2.3534(16) | Cd(1)-O(4A)       | 2.5666(14) |
| O(1)-Cd(1)-O(6)   | 126.49(5)  | O(1)-Cd(1)-O(3A)  | 96.50(5)   |
| O(6)-Cd(1)-O(3A)  | 136.64(5)  | O(1)-Cd(1)-N(1)   | 90.03(5)   |
| O(6)-Cd(1)-N(1)   | 91.67(5)   | O(3A)-Cd(1)-N(1)  | 93.83(5)   |
| O(1)-Cd(1)-N(2B)  | 87.42(5)   | O(6)-Cd(1)-N(2B)  | 90.40(5)   |
| O(3A)-Cd(1)-N(2B) | 85.77(5)   | N(1)-Cd(1)-N(2B)  | 177.36(5)  |
| O(1)-Cd(1)-O(4A)  | 149.50(5)  | O(6)-Cd(1)-O(4A)  | 83.86(5)   |
| O(3A)-Cd(1)-O(4A) | 53.84(4)   | N(1)-Cd(1)-O(4A)  | 85.63(5)   |
| N(2B)-Cd(1)-O(4A) | 96.22(5)   |                   |            |
| <b>2</b>          |            |                   |            |
| Cd(1)-O(6)        | 2.265(2)   | Cd(1)-O(1)        | 2.281(2)   |
| Cd(1)-N(1)        | 2.322(3)   | Cd(1)-N(2A)       | 2.341(3)   |
| Cd(1)-O(4B)       | 2.371(2)   | Cd(1)-O(3B)       | 2.478(2)   |
| O(6)-Cd(1)-O(1)   | 127.38(8)  | O(6)-Cd(1)-N(1)   | 93.34(8)   |
| O(1)-Cd(1)-N(1)   | 91.67(8)   | O(6)-Cd(1)-N(2A)  | 89.71(8)   |
| O(1)-Cd(1)-N(2A)  | 87.52(8)   | N(1)-Cd(1)-N(2A)  | 176.68(8)  |
| O(6)-Cd(1)-O(4B)  | 142.26(7)  | O(1)-Cd(1)-O(4B)  | 89.68(8)   |
| N(1)-Cd(1)-O(4B)  | 92.31(8)   | N(2A)-Cd(1)-O(4B) | 84.47(8)   |
| O(6)-Cd(1)-O(3B)  | 89.42(7)   | O(1)-Cd(1)-O(3B)  | 143.05(7)  |
| N(1)-Cd(1)-O(3B)  | 81.75(8)   | N(2A)-Cd(1)-O(3B) | 96.97(7)   |
| O(4B)-Cd(1)-O(3B) | 54.61(7)   |                   |            |

Symmetry codes: **(1)** A:  $x, y + 1, z$ ; B:  $-x + 1, -y, -z + 1$ . **(2)** A:  $-x + 2, -y + 1, -z + 1$ ; B:  $x, y - 1,$

$z$ .

(a)

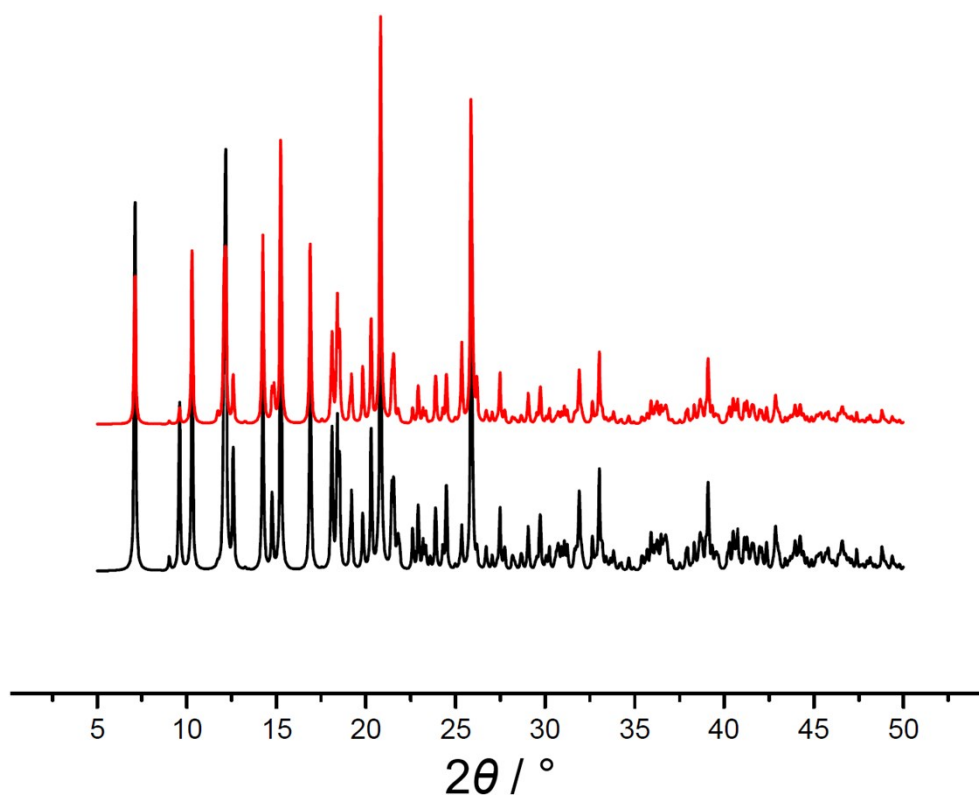

(b)

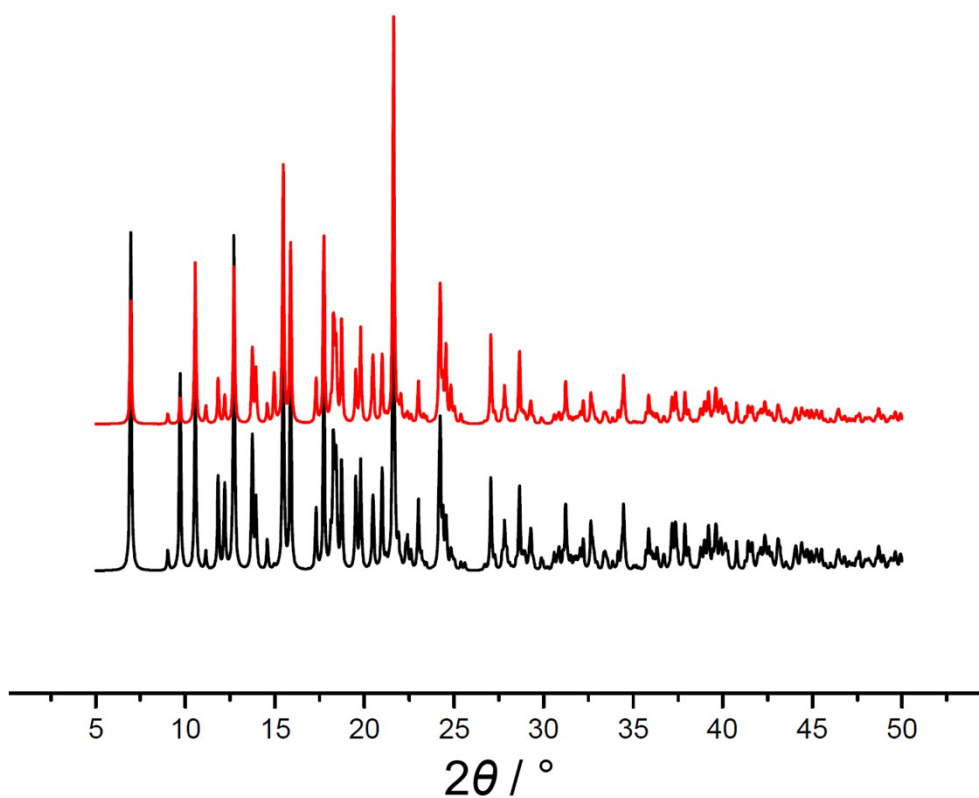

**Fig. S1** PXRD patterns for **1** (a) and **2** (b). Simulated: black; Experimental: red.

(a)

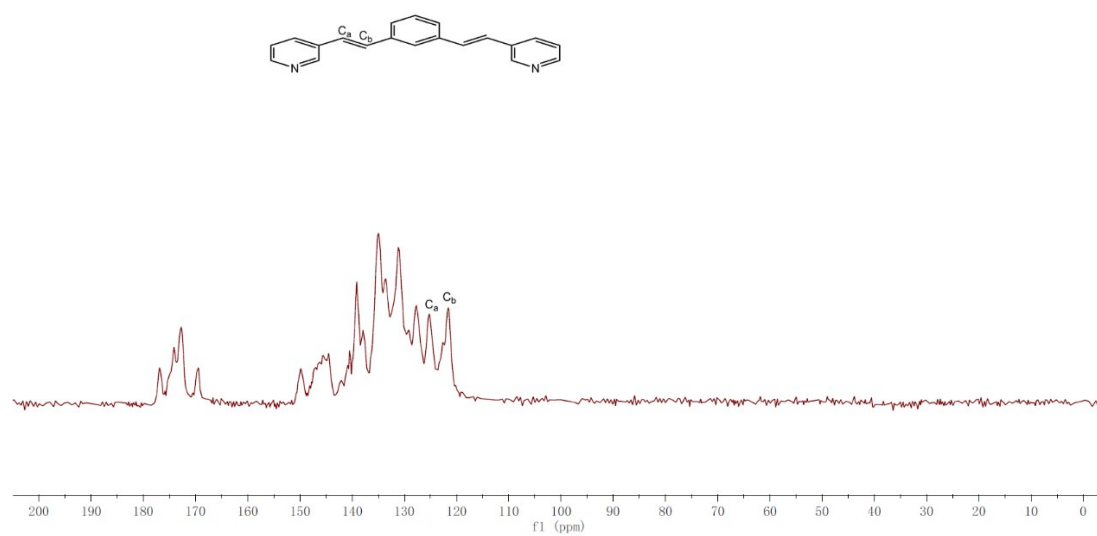

(b)

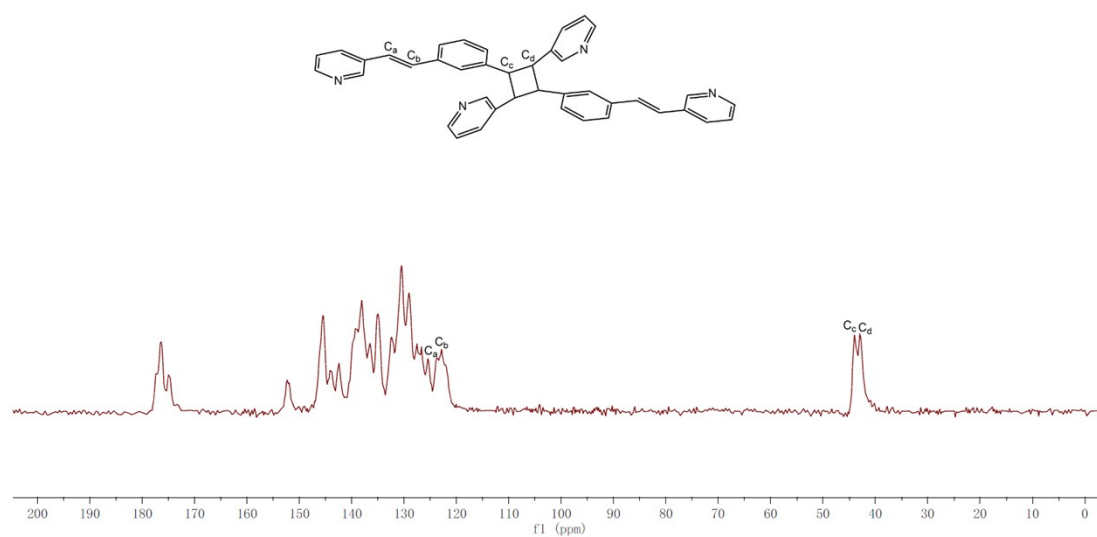

**Fig. S2** The  $^{13}\text{C}$  CPMAS NMR spectra of **1** (a) and **2** (b).



(a)

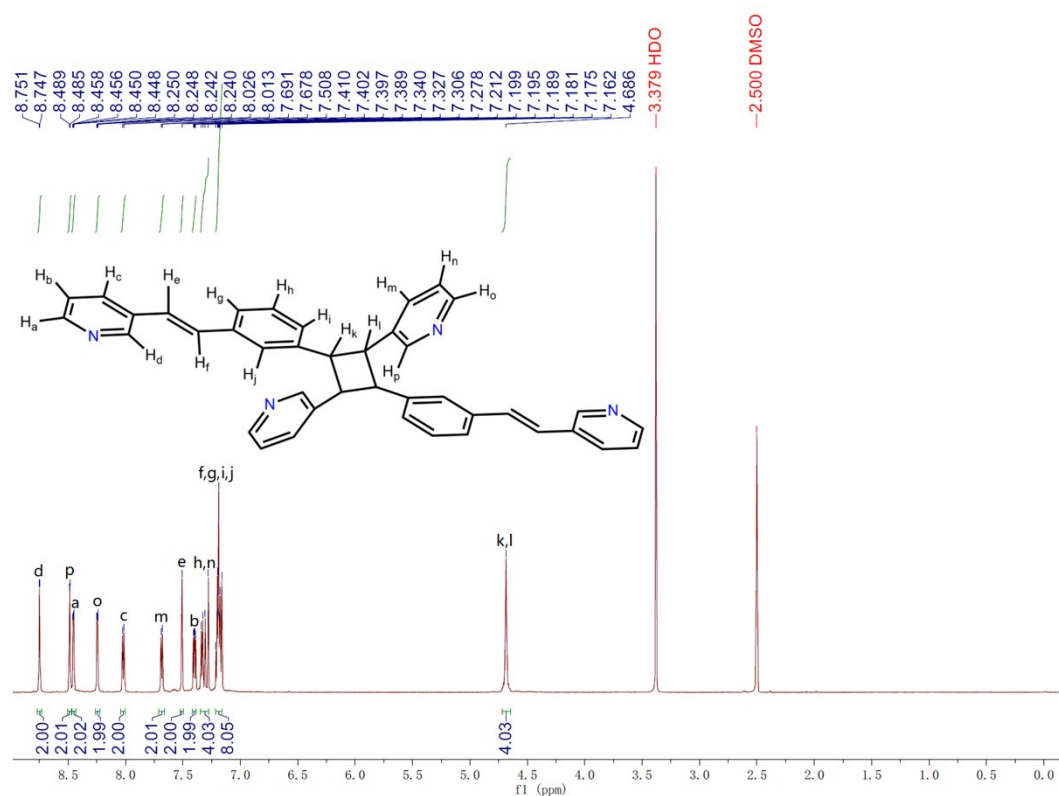

(b)

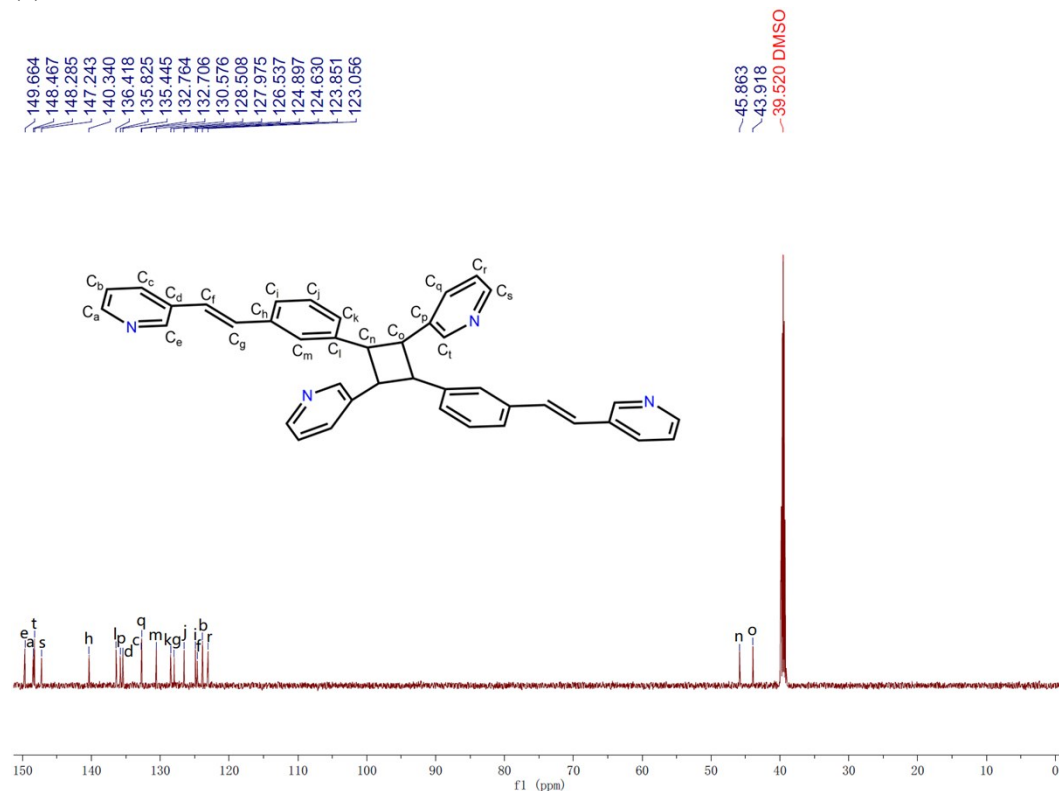

**Fig. S3** (a) The <sup>1</sup>H NMR spectrum of bpbvpvc in *d*<sub>6</sub>-DMSO at ambient temperature. (b) The <sup>13</sup>C NMR spectrum of bpbvpvc in *d*<sub>6</sub>-DMSO at ambient temperature.

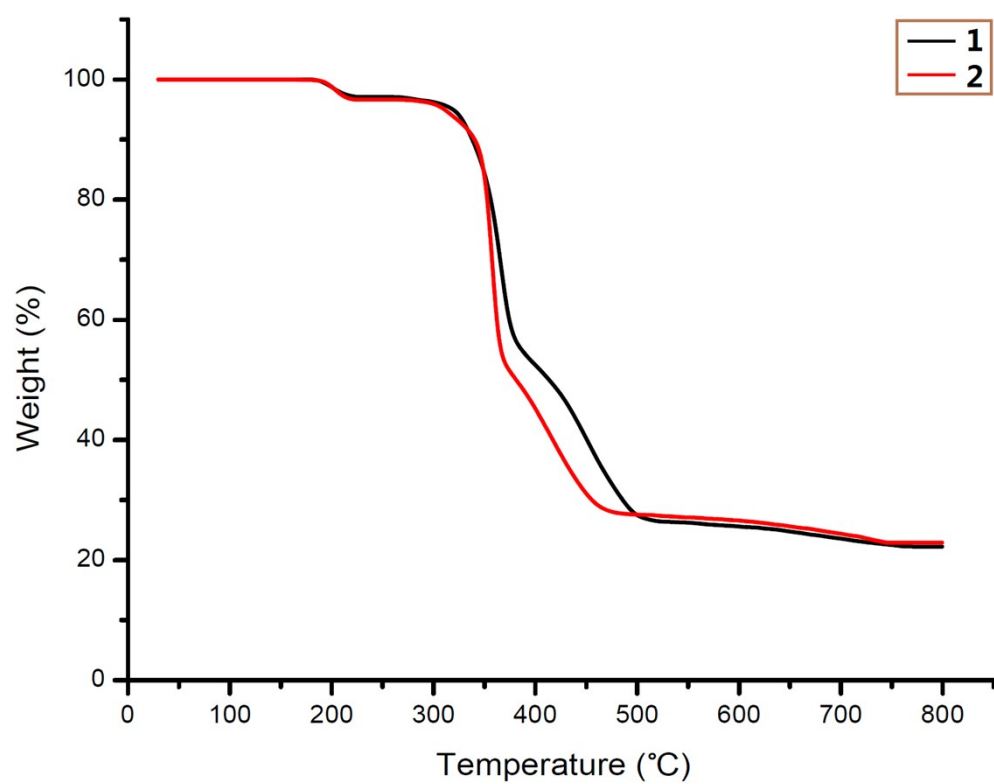

**Fig. S4** The TGA curves for **1** and **2**.
